# Supplementary material for: Time of day of vaccination affects SARS-CoV-2 antibody responses in an observational study of healthcare workers
Source: bioRxiv or medRxiv preprint supplement (doi:10.1101/2021.10.28.21265499), 2021-10-29
Supplement: Supplementary file [file media-1.pdf]

**Supplemental Figure 1:**

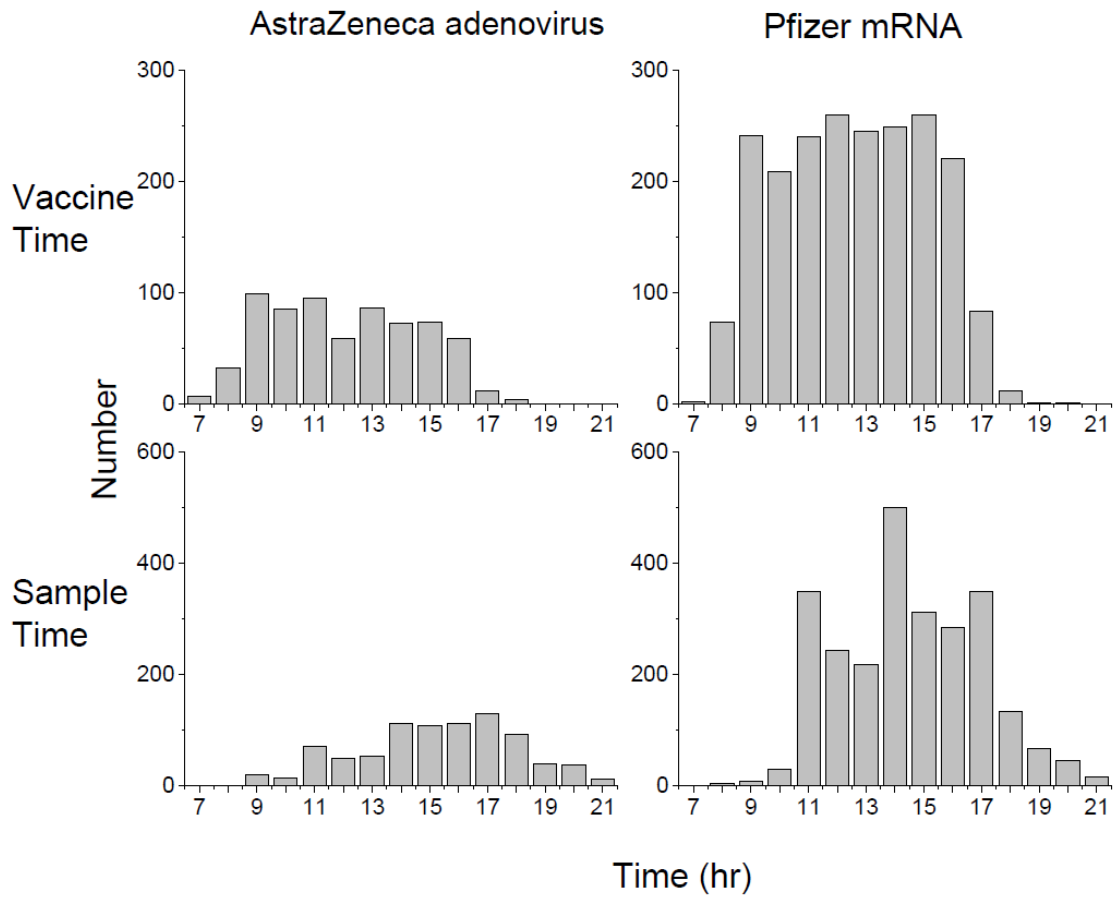

Histograms showing time (hour) of day of vaccinations (N=2784) and of sample collection (N=3425)

## Supplemental Figure 2

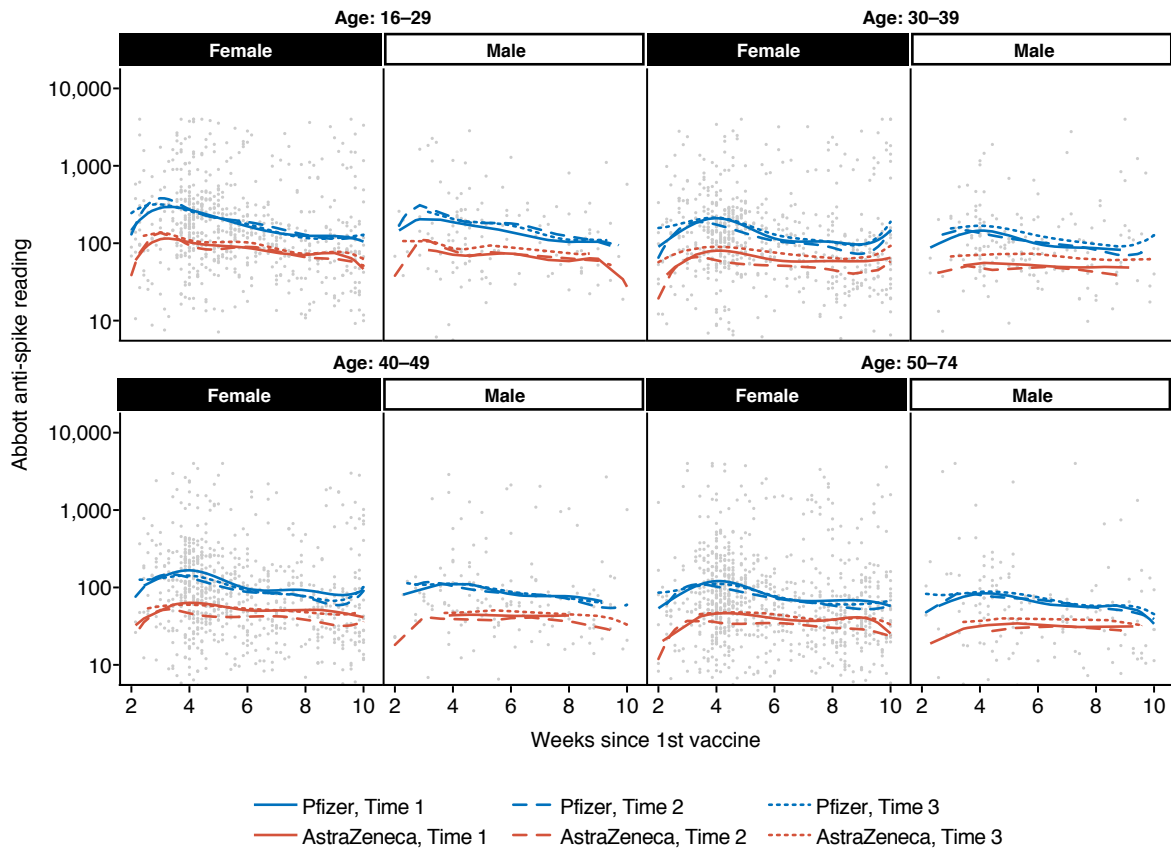

B-spline fit curves, including time-of-day of vaccination (Time 1, 07:00-10:59; Time 2, 11:00-14:59; Time 3, 15:00-21:59), vaccine type, age group, sex, and days post vaccination to log<sub>10</sub> (Anti-Spike antibody response) Data estimates are split by time-of-day of vaccination vaccine type (Pfizer mRNA, blue; AstraZeneca Adenovirus, red), age group, and sex (Female or Male).

**Supplemental Table 1: Type III tests of fixed effects from mixed effects model with sample time**

| <b>Effect</b>                                  | <b>Num DF</b> | <b>F</b> | <b>Probability</b> |
|------------------------------------------------|---------------|----------|--------------------|
| <i>Main Effects</i>                            |               |          |                    |
| Vaccination_Time<br>(Time 1, Time 2, Time 3) ‡ | 2             | 4.40     | 0.0123             |
| Sample_Time<br>(Time 1, Time 2, Time 3) ‡      | 2             | 2.34     | 0.0969             |
| Vaccine type<br>(AstraZeneca vs. Pfizer)       | 1             | 150.68   | <0.0001            |
| Age<br>(30-39, 40-49, 50-74 vs.16-29)          | 3             | 51.76    | <0.0001            |
| Sex<br>(Female vs. Male)                       | 1             | 6.02     | 0.0142             |
| Days post-vaccination                          | 6             | 19.24    | <0.0001            |
| <i>Interaction terms</i>                       |               |          |                    |
| Days*Vaccination_Time                          | 6             | 1.28     | 0.2230             |
| Days*Vaccine type                              | 6             | 7.26     | <0.0001            |
| Days*Age                                       | 18            | 1.73     | 0.0283             |
| Days*sex                                       | 6             | 1.09     | 0.3684             |
| Vaccination_Time*Vaccine type                  | 1             | 1.23     | 0.2926             |
| Vaccination_Time*Age                           | 3             | 0.71     | 0.6387             |
| Vaccination_Time*Sex                           | 1             | 0.42     | 0.6604             |

Details of the linear mixed modeling are: Time of vaccination (Time 1, 07:00-10:59; Time 2, 11:00-14:59; Time 3, 15:00-20:59), vaccine type (Pfizer or AstraZeneca), age groups (from Table 1A), sex, and days post-vaccination were treated as fixed factors. A B-spline transformation of days post-vaccination was used to model the non-linear pattern of anti-Spike antibody responses (log10 transformed) post vaccination.

DF= Degrees of Freedom.† For all F tests the denominator DF was 3357. ‡ For each F test, the fixed effect referent is the last term shown, the F and P values are the Type III tests of overall fixed effects.
